1 **Existence and Features of the Myodural Bridge in Gentoo Penguins: a**  
2 **morphological study**

3

4 Cheng Chen<sup>1</sup>, Sheng-bo Yu<sup>1</sup>, Yan-yan Chi<sup>1</sup>, Guang-yuan Tan<sup>2</sup>, Bao-cheng Yan<sup>2</sup>, Nan  
5 Zheng<sup>1\*</sup>, Hong-Jin Sui<sup>1,3\*</sup>

6 1 Department of Anatomy, College of Basic Medicine, Dalian Medical University,  
7 Dalian, China

8 2 Haichang Ocean Park Holdings.,Ltd, Biological Conservation Center, Shanghai,  
9 China

10 3 Dalian Hoffen Preservation Institution, Dalian, China

11 \*Corresponding to:

12 Prof. Dr. Hong-Jin Sui, Department of Anatomy, College of Basic Medicine, Dalian  
13 Medical University, Dalian, China. E-mail address: [suihj@hotmail.com](mailto:suihj@hotmail.com)

14 Prof. Dr. Nan Zheng, Department of Anatomy, College of Basic Medicine, Dalian  
15 Medical University, Dalian, China. E-mail address: [zhengnan831016@163.com](mailto:zhengnan831016@163.com)

16

17

18

19

20

21

22

## 23 **Abstract**

24

25 Recent studies have evidenced that the anatomical structure now known as the myodural bridge  
26 (MDB) connects the suboccipital musculature to the cervical spinal dura mater (SDM). In humans,  
27 the MDB passes through both the posterior atlanto-occipital and the posterior atlanto-axial  
28 interspaces. The present authors suggest that the MDB has important physiological functions in  
29 humans. The existence of the MDB in various mammals, including flying birds (*Rock pigeons and*  
30 *Gallus domesticus*) has been previously validated. Gentoo penguins are marine birds, able to make  
31 450 dives per day, reaching depths of up to 660 feet. Gentoo penguins are also the world's fastest  
32 diving birds. The present study was therefore carried out to investigate the existence and  
33 characteristics of the MDB in Gentoo penguin (*Pygoscelis papua*), a non-flying, marine bird that  
34 can dive. While foraging, this penguin is able to reach speeds of up to 22 miles per hour. For this  
35 study, six Gentoo penguin specimens were dissected to observe the existence and composition of  
36 their MDB. Histological staining was also performed to analyze the anatomic relationships and  
37 characteristic of the MDB in the Gentoo penguin. In this study, it was found that the suboccipital  
38 musculature in the Gentoo penguin consists of the rectus capitis dorsalis minor (RCDmi) muscle  
39 and rectus capitis dorsalis major (RCDma) muscle. Dense connective tissue fibers were observed  
40 connecting these two suboccipital muscles to the spinal dura mater (SDM). This dense connective

41 tissue bridge consists of primarily type I collagen fibers. Thus, this penguin's MDB appears to  
42 be analogous to the MDB previously observed in humans. The present study evidences that the  
43 MDB not only exists in penguins but it also has unique features that distinguishes it from that of  
44 flying birds. Thus, this study advances the understanding of the morphological characteristics of  
45 the MDB in flightless, marine birds.

46

47 Key words: Myodural bridge, Gentoo penguins, Morphology, Suboccipital muscles, Histologic  
48 staining

49

## 50 **Introduction**

51

52 The tissue bridge connecting a suboccipital muscle (RCPmi) to the cervical spinal dura mater  
53 (SDM) in humans was identified in the atlanto-occipital interspace by Hack et al., naming it the  
54 “myodural bridge” [1]. The myodural bridge (MDB) is now described as a fibrous, dense structure  
55 connecting the suboccipital musculature to the SDM, including fibers originating from the rectus  
56 capitis posterior minor (RCPmi) muscle, the rectus capitis posterior major (RCPma) muscle, the  
57 obliques capitis inferior (OCI) muscle, and the nuchae ligament (NL) [2-7]. With these in-depth  
58 studies, many researchers now speculate that the MDB may play a significant role in physiological  
59 functions. It has been proposed that the MDB's fibers connecting the suboccipital muscles to the  
60 cervical SDM [1] might prevent dural infolding, thus maintaining the normal flow of the  
61 cerebrospinal fluid within the cisterna magna or cerebellomedullaris cistern [4, 7-12]. Sui et al.

62 (2013) proposed that the MDB may play an important roles in modulating the circulation of  
63 cerebrospinal fluid. According to recent reports, MDB dysfunction may occur with pathological  
64 conditions of the RCPmi muscle, resulting in the generation of cervicogenic headache, and other  
65 craniofacial disorders [13-17].

66 In recent years, researchers have found that the MDB is a universal structure in mammals [18],  
67 including marine mammals (*Nephocaena phocaenoides* and *sperm whales*) [19, 20]. The MDB  
68 also exists in reptiles (*Siamese crocodile* and *Trachemys scripta elegans*) [21, 22], as well as in  
69 birds (*Rock pigeons* and *Gallus domesticus*) [23, 24]. Therefore the universal existence of the  
70 MDB among reptiles, birds, and mammals suggests that the MDB is an evolutionarily conserved  
71 anatomic structure having important biological functions. Moreover, we suggest that there may be  
72 structural differences in among various animals to adapt to different environmental conditions.

73 Penguins are unique birds that can both walk on land and dive and swim in deep water. Penguins  
74 are flightless birds, unlike the Rock pigeon and the *Gallus domesticus*. This marine bird's ability  
75 to swim presents it with different living environments and habits, then those of non-marine birds.  
76 Therefore, Gentoo penguins will be studied in this paper. This study will provide a comparative  
77 anatomical foundation for the future study of the MDB in different animals.

78

## 79 **Materials and Methods**

80

81 For this scientific research study, six adult Gentoo penguin specimens from Haichang Ocean Park  
82 Holdings., Ltd., that died of natural causes, were obtained with approval from both the Chinese

83 Authorities for Animal Protection and also approved by from the Ethics Committee of Dalian  
84 Medical University.

85 In addition, all experiments were conducted in accordance with the guidelines and regulations of  
86 Dalian Medical University. The collected Gentoo penguin carcasses were immobilized in a 10%  
87 formalin solution for subsequent experiments.

88

## 89 **Anatomical dissection in the suboccipital region**

90

91 Three of the six penguin specimens were used for gross dissection. The epidermis was cut  
92 longitudinally along the dorsal midline of the specimens, and the suboccipital musculature was  
93 fully exposed. The deep suboccipital musculature, including the RCDmi, (analogous to the RCPmi  
94 muscle found in humans) and the RCDma, (analogous to the RCPma muscle also found in  
95 humans) was exposed. The deep suboccipital muscles (RCDmi and RDCma) were then both cut  
96 from the bony occipital crest to observe their connections with the dorsal atlanto-occipital  
97 membrane (DAOM, analogous to the PAOM observed in humans) and the dorsal atlanto-axial  
98 membrane. Next the DAOM was also cut along its cranial attachment to observe the connection  
99 between the DAOM and the SDM. Lateral incision of the posterior arch of the atlas was also made  
100 to observe the connection between the dorsal atlanto-axial membrane and the SDM. The  
101 photographic materials were taken with a Canon 7D camera (Canon Inc., Tokyo, Japan).

102

## 103 **Histological slices and staining**

104

105 Three specimens were used for histological studies. Tissue samples of the occiput and the cervical  
106 region were immobilized in a 10% formalin solution for ten days. Subsequently, the specimens  
107 were transferred to Jiang Weizhong's decalcification solution for decalcification. The Jiang  
108 Weizhong's decalcification solution was changed at three-day intervals until the bone was easily  
109 punctured by a needle (21 days). The decalcified tissue samples were then washed overnight in  
110 running water, and then dehydrated with increasing grades of alcohol, transparent in xylene, and  
111 then infiltrated with melted paraffin, and embedded. A rotary microtome (Leica Micro HM450;  
112 Lei Microsystems GmbH, Wetzlar, Germany) was used to cut 8- $\mu$ m-thick slices. These tissue  
113 slices were then divided into three groups: Group 1 slices were used for Hematoxylin and Eosin  
114 (HE) staining, which can show the general structural features of the MDB; Group 2 slices were  
115 used for Masson trichrome staining (Masson), to detect any collagen fibers in the MDB; Group 3  
116 slices were used for Picrosirius Red (PRS) staining, which can also detect collagen fibers in the  
117 MDB, and most importantly, collagen types can be distinguished when viewed with a polarized  
118 light microscope. Microscopic examination and photography were carried out with the Nikon  
119 ECLIPSE80i research light microscope, and multiple images of each section were stitched  
120 together using the Microsoft Image Synthesis Editor of Nikon ECLIPSE80i Image Processing and  
121 Analysis System. The results of Picric acid-Sirius red staining were observed with a light  
122 microscope as well as a polarized light microscope.

123

## 124 **Results**

125

### 126 **Anatomical dissection of the suboccipital region**

127

128 The RCDmi and the RCDma muscles, located in the deep suboccipital region, were observed to be  
129 tightly connected to each other (Fig 1a). The cranial end of RCDmi muscle attached to the medial  
130 part of the occipital crest, and the caudal end attached to the dorsal side of the posterior tubercle of  
131 atlas. Moreover multiple dense fibrous tissues were observed to originate from the ventral part of  
132 the RCDmi connect to the DAOM (Fig 1b). The DAOM and the SDM were intimately connected  
133 to each other by numerous trabecular fibrous bundles (Fig 1c). The cranial end of the RCDma  
134 muscle attached to the lateral aspect of the occipital crest, and the caudal end attached to the  
135 spinous process of the axis. Some of the dense fibrous bundles originating from the ventral part of  
136 the RCDma muscle connected to the dorsal atlanto-axial membrane (Fig 2a). The dorsal  
137 atlanto-axial membrane adheres tightly to the SDM via several dense cord-like fibrous tissue (Fig  
138 2b). This cord-like trabecular fibrous tissue was found in all the three specimens.

139

#### 140 **Fig 1. Gentoo penguin, dorsal views of an anatomical dissection of the deep suboccipital**

141 **space.** a: Superficial view of the deep suboccipital region. The RCDmi and the RCDma are  
142 connected tightly. b: The connection between the RCDmi and the DAOM. The ventral surface of  
143 the RCDmi is connected by multiple dense fibrous tissues (arrow) to the DAOM (hollow star). c:  
144 The connection between the DAOM and the SDM. The DAOM was separated from its cranial

145 attachment at the foramen magnum, and the ventral surface of the DAOM is connected by  
146 trabecular fibrous bundles (arrow) to the SDM (hollow triangle). Abbreviation: OCCI=occipital  
147 bone; RCDmi=rectus capitis dorsalis minor muscle; RCDma=rectus capitis dorsalis major muscle;  
148 DAOM=dorsal atlanto-occipital membrane; SDM=spinal dura mater; C1=posterior arch of atlas.

149 **Fig 2. Gentoo penguin, dorsal views of an anatomical dissection of the Atlanto-axial**

150 **interspace.** a: The connection between the RCDma and the dorsal atlanto-axial membrane. The  
151 ventral surface of RCDma is connected by dense fibrous bundles (arrow) to the dorsal  
152 atlanto-axial membrane. b: The connection between the dorsal atlanto-axial membrane and the  
153 SDM. The dorsal atlanto-axial membranewas separated from its posterior arch of atlas, and the  
154 ventral surface of the the dorsal atlanto-axial membrane is connected by dense cord-like fibrous  
155 tissues (arrow) to the SDM (hollow crescent). Abbreviation: RCDmi=rectus capitis dorsalis minor  
156 muscle; RCDma=rectus capitis dorsalis major muscle; SDM=spinal dura mater; C1=posterior arch  
157 of atlas.

158

159 **Histology studies**

160

161 In the HE-stained sections, multiple dense fibers originating from the ventral anterior aspect of  
162 RCDmi pass through the atlanto-occipital interspace (Fig 3a). These fibers extend from the ventral  
163 side of the RCDmi muscle and terminate in the DAOM. The DAOM emitted dense fibrous  
164 bundles and connected with the SDM passing through several venous sinuses (Fig 3b,c). However,  
165 different origins of these connective fibers in the atlanto-axial interspace were found. Some of the



166 fibrous bundles originating from the ventral part of the RCDmi connect with the dorsal  
167 atlanto-axial membrane directly (Fig 3d). Fibers originating from the ventral aspect of RCDma as  
168 well as fibers originating from the OCP fuse together then pass through the dorsal atlanto-axial  
169 membrane and terminate on the SDM (Fig 3d). These connective tissue fibers observed between  
170 the muscles and the SDM are analogous to the MDB fibers previously observed in humans. In the  
171 Masson-stained sections, the muscular fibers were stained red, and the MDB fibers were stained  
172 blue (Fig 4). The results of the Masson staining demonstrate that the MDB fibers present in  
173 Gentoo penguins are collagenous fibers. In the PSR-stained sections, the fibers of the MDB were  
174 stained red under when viewed the ordinary optical microscope (Fig 5a), which implies that the  
175 penguin MDB is composed primarily of collagen fibers. Viewed with the polarizing microscope,  
176 the fibrous tissues of MDB were stained either red or yellow (Fig 5b,c,d). This observation implies  
177 that the MDB is composed of primarily type I collagen fibers.

178

179 **Fig 3. Gentoo penguin, prepared sagittal section of the suboccipital region with stained with**  
180 **HE.** Area within square in a is shown enlarged in b, c, and d. The fibers (arrow) originate from the  
181 ventral anterior of RCDmi, extend directly into the atlanto-occipital interspace, then fuse with the  
182 DAOM, and the DAOM extends into a fiber bundle through the venous sinus to connect with the  
183 SDM (hollow triangle). In the atlanto-axial interspace, the dense fibers bundles (arrow) originating  
184 from the ventral of RCDmi run ventrally, and integrate into the dorsal atlanto-axial membrane  
185 (hollow crescent) together with the dense fibers (filled arrowhead) originating from the RCDma  
186 and OCP, and send out dense fibers bundles to closely connect with the SDM. Abbreviation:  
187 OCCI=occipital bone; RCDmi=rectus capitis dorsalis minor muscle; OCP=oblique capitis

188 posterior; DAOM=dorsal atlanto-occipital membrane; SDM=spinal dura mater; C1= atlas;

189 C2=axial;V=venous sinus

190 **Fig 4. Gentoo penguin, prepared sagittal section of the suboccipital region with stained with**

191 **Masson.** Area within square in a is shown enlarged in b, c, and d. The fibers (arrow) originate

192 from the ventral anterior of RCDmi, extend directly into the atlanto-occipital interspace, then fuse

193 with the DAOM, and the DAOM extends into a fiber bundle through the venous sinus to connect

194 with the SDM (hollow triangle). In the atlanto-axial interspace, the dense fibers bundles (arrow)

195 originating from the ventral of RCDmi run ventrally, and integrate into the dorsal atlanto-axial

196 membrane (hollow crescent) together with the dense fibers(filled arrowhead) originating from the

197 RCDma and OCP, and send out dense fibers bundles to closely connect with the SDM.

198 Abbreviation: OCCI=occipital bone; RCDmi=rectus capitis dorsalis minor muscle; OCP=oblique

199 capitis posterior; DAOM=dorsal atlanto-occipital membrane; SDM=spinal dura mater; C1= atlas;

200 C2=axial; V=venous sinus.

201 **Figure 5. Gentoo penguin, prepared sagittal section of the suboccipital region with stained**

202 **with PSR-stained.** Area within square in a is shown enlarged in b, c and d. The fibers (arrow)

203 originate from the ventral anterior of RCDmi, extend directly into the atlanto-occipital interspace,

204 then fuse with the DAOM, and the DAOM extends into a fiber bundle through the venous sinus to

205 connect with the SDM (hollow triangle). In the atlanto-axial interspace, the dense fibers bundles

206 (arrow) originating from the ventral of RCDmi run ventrally, and integrate into the dorsal

207 atlanto-axial membrane (hollow crescent) together with the dense fibers(filled arrowhead)

208 originating from the RCDma and OCP, and send out dense fibers bundles to closely connect with

209 the SDM. Abbreviation: OCCI=occipital bone; RCDmi=rectus capitis dorsalis minor muscle;

210 OCP=oblique capitis posterior; DAOM=dorsal atlanto-occipital membrane; SDM=spinal dura

211 mater; C1= atlas; C2=axial; V=venous sinus.

212

## 213 **Discussion**

214

215 In 1995 Hack et al. initially proposed the concept of the MDB [1]. Numerous researchers have  
216 since studied the MDB in detail, confirming the MDB's existence in both humans [1-7] and  
217 animals [18-24]. These researchers have further hypothesized about the putative physiological  
218 functions of the MDB [8-17]. The MDB is described as a dense connective tissue bridge  
219 connecting the suboccipital musculature to the cervical SDM, while passing through the posterior  
220 atlanto-occipital and the atlanto-axial interspaces. Therefore, what is unique about the penguin as  
221 a natatores.

222

223 According to the observation of the gross anatomy of the penguin, evidenced in the present study,  
224 the deep suboccipital musculature of the Gentoo penguin consists of the RCDmi and the RCDma  
225 muscles. The cranial ends of both the RCDmi and the RCDma muscles respectively attach to the  
226 medial and lateral aspects of the occipital crest. They were intimately related to each other and not  
227 easily separated. Interestingly, it was previously found that the RCDmi muscle of *the Nephocaena*  
228 *phocaenoides* was located on the deep surface of the RCDma, and the RCDmi was observed  
229 originating from occiput [19]. Furthermore, the RCDmi of the *sperm whale* was previously found  
230 to originate from the dorsal aspect of the occipital squama [20]. This spatial distribution of the

231 RCDmi in marine mammals (*Nephocaena phocaenoides* and *sperm whale*) is similar to that of the  
232 Gentoo penguin. However, the cranial attachments of both the RCDmi and RCDma muscle of the  
233 Gentoo penguin are distinct from that observed in other birds (*Rock pigeons* and *Gallus*  
234 *domesticus*). The cranial aspect of the RCDmi attached below the transverse nuchal crest, and the  
235 both the RCDmi and RCDma muscle were easily detached [23, 24]. This difference may be  
236 related to the survival and feeding behavior of the penguin. These behaviors can be inferred from  
237 skull morphology [28].

238

239 In the present study, we have confirmed the existence of the MDB in the Gentoo penguin through  
240 multiple methods. In the atlanto-occipital interspace of the Gentoo penguins, the dense MDB  
241 fibers originated primarily from the ventral aspect of the RCDmi. These fibers extend from the  
242 ventral side and extend superiorly to fuse with the DAOM. Then these fibers connect with the  
243 SDM passing through the venous sinus. In the atlanto-axial interspace of the Gentoo penguin, the  
244 dense MDB fibers originate from the ventral of the RCDmi, the RCDma, and the OCP, all  
245 converging to form the MDB, and then passing through the dorsal atlanto-axial membrane, which  
246 is tightly connected to the SDM. The arrangement of the fibers of the MDB, observed in the  
247 Gentoo penguin is similar to that of other birds [23, 24] and mammals [18]. Although penguins  
248 live in different conditions from that of the *Rock pigeons* and the *Gallus domesticus*, they all  
249 possess an MDB. Once again, the MDB is seen as a highly conserved structure. During the course  
250 of biological evolution, structures that are not functionally important tend to degrade, and this  
251 evolutionary conservation of the MDB demonstrates the significance of MDB. In addition, the  
252 MDB observed in the Gentoo penguin presents as a dense fibrous structure that is composed of

253 type I collagen fibers.

254

255 While, being a marine bird, penguin not only has the same type of MDB as that observed in flying  
256 birds, but also has the same spatial distribution of the suboccipital muscles like marine mammals.

257 What then are the similarities and differences between the MDB of penguins and marine

258 mammals? Research has confirmed that no DAOM found in the posterior interspace between the

259 occipital bone and atlas of *Nephocaena phocaenoides* [19]. The tendinous fibers of the RCDmi

260 observed in the *Nephocaena phocaenoides* projected through the atlanto-occipital interspace

261 attaching directly to the SDM. This direct connection between the RCDmi and the SDM of the

262 *Nephocaena phocaenoides* might create a more pronounced effect of the RCDmi muscle on the

263 SDM [19]. Furthermore, the present authors have confirmed that *sperm whales* have two different

264 origins of their MDB: one origin is from the ODB (occipital dural bridge) which originates from

265 the periosteal surface of the occiput and fuses with the dura mater [20], and the other bridge

266 (MDB) originates from the RCDmi, which transmits the tension from the RCDmi to the dura

267 mater. The MDB stabilizes the dura mater, the spinal cord, and the ODB [20]. The MDB,

268 observed in the atlanto-occipital interspace of penguins, is primarily composed of dense

269 connective tissue fibers originating from the RCDmi muscle. Therefore, there is a type of the

270 MDB, originating from the RCDmi, in penguins, *sperm whales*, and *Nephocaena phocaenoides*

271 which all pass through the atlanto-occipital interspace. Moreover, they have similar distribution of

272 suboccipital muscles and the presence of numerous suboccipital venous sinuses. As these different

273 animals live in similar conditions, some of their anatomic structures tend to be similar. This is

274 referred to as the “similar effect”. Therefore, as the penguin is capable of navigating in deep

275 water, this ability may be associated with cerebrospinal fluid circulation. This also demonstrates  
276 that the MDB is a significant and highly conserved anatomic structure.

277

278 Interestingly, the *sperm whale* has an atlas and six fused vertebra (C2-C7) [27], while their MDB  
279 exists only in the atlanto-occipital interspace, with extensive venous plexus among the MDB  
280 fibers within their atlanto-occipital interspace [20]. As *sperm whales* swim to great depths, the  
281 MDB of these animals may contribute to transferring the tensile forces generated by the  
282 suboccipital muscles to the cervical dura mater and thereby continuously alter the volume of the  
283 CSF contained within the subarachnoid space, acting as a unique mechanism to facilitate  
284 circulation of the CSF [20]. The penguin's MDB exists in both the atlanto-occipital and the  
285 atlanto-axial interspaces, and there are numerous venous sinuses among the MDB fibers. As the  
286 penguin dives to great ocean, the contraction of MDB fibers via the suboccipital musculature may  
287 accelerate venous blood flow back to the heart and also promote cerebrospinal fluid circulation.

288 According to previous research, the penguin can dive to approximately 100 meters within 3  
289 minutes [29, 30]. Therefore, the penguin's MDB might be a key structure which helps the penguin  
290 to maintain normal cerebrospinal fluid circulation during deep dives.

291

292 In this study, the present authors validated that there are dense connective tissues (MDB) in both  
293 the atlanto-occipital and atlanto-axial interspaces of Gentoo penguin, that are composed of  
294 primarily type I collagen fibers. Therefore, this finding implies that the MDB is not only a highly  
295 conserved anatomic structure, from an evolutionary point of view, but also has its variant structure

296 for acclimatization. These findings provide supporting evidence for research into the physiological  
297 function of the MDB.

298

## 299 **Acknowledgements**

300 We are grateful to Haichang Ocean Park Holdings.,Ltd for provision of cadaveric specimens.

301 Thanks to Gary D. Hack of University of Maryland School of dentistry, USA, for helping with  
302 language editing.

303

## 304 **References**

305

- 306 1. Hack, G. D., Koritzer, R. T., Robinson, W. L., Hallgren, R. C., & Greenman, P. E. 1995.  
307 Anatomic Relation between the Rectus Capitis Posterior Minor Muscle and the Dura Mater.–  
308 Spine. 20(23), 2484–2486. doi: 10.1097/00007632-199512000-00003.
- 309 2. Mitchell BS, Humphreys BK, Osullivan E. 1998. Attachments of the ligamentum nuchae to  
310 cervical posterior spinal dura and the lateral part of the occipital bone.–J Manipulative  
311 Physiol Ther. 21(3):145–148.
- 312 3. Nash L, Nicholson H, Lee AS, Johnson GM, Zhang M. 2005. Configuration of the  
313 Connective Tissue in the Posterior Atlanto-Occipital Interspace: A Sheet Plastination and  
314 Confocal Microscopy Study. – Spine. 30(12):1359–1366. doi:  
315 10.1097/01.brs.0000166159.31329.92.

- 316 4. Scali, F., Marsili, E. S., & Pontell, M. E. 2011. Anatomical Connection Between the Rectus  
317 Capitis Posterior Major and the Dura Mater.—*Spine*. 36(25):E1612–E1614.  
318 doi:10.1097/brs.0b013e31821129df.
- 319 5. Pontell ME, Scali F, Marshall E, Enix D. 2013. The obliquus capitis inferior myodural  
320 bridge.—*Clin Anat*. 26(4):450–454. doi: 10.1002/ca.22134.
- 321 6. Palomeque-del-Cerro, L., Arráez-Aybar, L. A., Rodríguez-Blanco, C., Guzmán-García, R.,  
322 Menendez-Aparicio, M., & Oliva-Pascual-Vaca, Á. 2017. A Systematic Review of the  
323 Soft-Tissue Connections Between Neck Muscles and Dura Mater. — *Spine*. 42(1):49–54.  
324 doi:10.1097/brs.0000000000001655.
- 325 7. Zheng N, Yuan XY, Li YF, Chi YY, Gao HB, Zhao X, Yu SB, Sui HJ, John Sharkey. 2014.  
326 Definition of the to be named ligament and vertebro-dural ligament and their possible effects  
327 on the circulation of CSF. — *PloS one*. 9(8): e103451. doi:10.1371/journal.pone.0103451.
- 328 8. Rutten HP, Szpak K, van Mameren H, Ten Holter J, de Jong JC. 1997. Anatomic relation  
329 between the rectus capitis posterior minor muscle and the dura mater. — *Spine*. 22(8):924–926.  
330 doi: 10.1097/00007632-199704150-00018.
- 331 9. Sui HJ, Yu SB, Yuan XY, Gao HB, Xu Q, Li XF. 2013. Anatomical study on the connections  
332 between the suboccipital structures and the spinal dura mater. — *Chinese journal of clinical*  
333 *anatomy*. 31:489–490.
- 334 10. Pontell ME, Scali F, Enix DE, Battaglia PJ, Marshall E. 2013. Histological examination of  
335 the human obliquus capitis inferior myodural bridge. — *Ann Anat*. 195(6), 522–526.  
336 doi:10.1016/j.aanat.2013.04.013.



- 337 11. Scali F, Pontell ME, Enix DE, Marshall E. 2013. Histological analysis of the rectus capitis  
338 posterior major's myodural bridge. — *Spine J.* 13(5):558–563.  
339 doi:10.1016/j.spinee.2013.01.015.
- 340 12. Scali F, Pontell ME, Welk AB, Malmstrom TK, Marshall E, Kettner NW. 2013. Magnetic  
341 resonance imaging investigation of the atlanto-axial interspace. — *Clin Anat.* 2013  
342 May;26(4):444-449. doi: 10.1002/ca.22094.
- 343 13. Hack GD, Hallgren RC. 2014. Chronic headache relief after section of suboccipital muscle  
344 dural connections:a case report. — *Headache.* 44(1):84–89. doi:  
345 10.1111/j.1526-4610.2004.04015.x.
- 346 14. Fernández-de-las-Peñas, C., Bueno, A., Ferrando, J., Elliott, J., Cuadrado, M., Pareja, J.  
347 2007. Magnetic Resonance Imaging Study of The Morphometry of Cervical Extensor  
348 Muscles in Chronic Tension-Type Headache. — *Cephalalgia.* 27(4), 355–362.  
349 doi:10.1111/j.1468-2982.2007.01293.x.
- 350 15. Bogduk N. 2001. Cervicogenic headache: anatomic basis and pathophysiologic mechanisms.  
351 — *Curr Pain Headache Rep.* 5(4):382-386. doi: 10.1007/s11916-001-0029-7.
- 352 16. Fernández-de-las-Peñas, C., Cuadrado, M. L., Arendt-Nielsen, L., Ge, H.-Y., Pareja, J. A.  
353 2008. A proposed etiology of cervicogenic headache: the neurophysiologic basis and  
354 anatomic relationship between the dura mater and the rectus posterior capitis minor muscle.  
355 — *Am J Phys Med Rehabil.* 87(3):197-203. doi: 10.1097/PHM.0b013e3181619766.
- 356 17. Yuan XY, Yu SB, Liu C, Xu Q, Zheng N, Zhang JF, Chi YY, Wang XG, Lin XT, Sui HJ.  
357 2016. Correlation between chronic headaches and the rectus capitis posterior minor muscle:

- 358 A comparative analysis of cross-sectional trail. — *Cephalalgia*. 37(11):1051-1056. doi:  
359 10.1177/0333102416664775.
- 360 18. Zheng N, Yuan XY, Chi YY, Liu P, Wang B, Sui JY, Han SH, Yu SB, Sui HJ. 2017. The  
361 universal existence of myodural bridge in mammals: an indication of a necessary function. —  
362 *Sci Rep*. 7(1):8248. doi: 10.1038/s41598-017-06863-z.
- 363 19. Liu P, Li C, Zheng N, Xu Q, Yu SB, Sui HJ. 2017. The myodural bridge existing in the  
364 *Nephocaena phocaenoides*. — *PLoS One*. 12(3):e0173630. doi: 10.1371/journal.pone.0173630.
- 365 20. Liu P, Li C, Zheng N, Yuan Xy, Zhou Y, Chun P, Chi YY, Gilmore Campbell, Yu SB, Sui  
366 HJ. 2018. The myodural bridges' existence in the sperm whale. — *PLoS One*. 13(7):e0200260.  
367 doi: 10.1371/journal.pone.0200260.
- 368 21. Zhang JH, Tang W, Zhang ZX, Luan BY, Yu SB, Sui HJ. 2016. Connection of the Posterior  
369 Occipital Muscle and Dura Mater of the Siamese Crocodile. — *Anat Rec (Hoboken)*.  
370 299(10):1402-1408. doi: 10.1002/ar.23445.
- 371 22. Zhao Huangfu, Xiao Zhang, Jia-Ying Sui, Qi-Qi Zhao, Xiao-Ying Yuan, Chan Li, Ya-Ru  
372 Dou, Wei Tang, Mei-Ling Du, Nan Zheng, Yan-Yan Chi, Sheng-Bo Yu, Hong-Jin Sui. 2019.  
373 Existence of Myodural Bridge in the *Trachemys scripta elegans*: Indication of its Important  
374 Physiological Function. — *Int J Morphol*. 37(4):1353-1360.
- 375 23. Chukwuemeka Samuel Okoye, Zheng N, Yu SB, Sui HJ. 2018. The myodural bridge in the  
376 common rock pigeon ( *Columbia livia* ) : Morphology and possible physiological  
377 implications. — *J Morphol*. 279(10):1524-1531. doi: 10.1002/jmor.20890.

- 378 24. Dou YR, Zheng N, Gong J, Tang W, Chukwuemeka Samuel Okoye, Zhang Y, Chen YX ,  
379 Zhang Y, Pi SY, Qu LC, Yu SB, Sui HJ. 2019. Existence and features of the myodural bridge  
380 in *Gallus domesticus*: indication of its important physiological function. — *Anat Sci Int*.  
381 94(2):184-191. doi: 10.1007/s12565-018-00470-2.
- 382 25. Zumpano MP, Hartwell S, Jagos CS. 2006. Soft tissue connection between rectus capitus  
383 posterior minor and the posterior atlanto-occipital membrane: a cadaveric study. — *Clin Anat*.  
384 19(6):522-7. doi: 10.1002/ca.20220.
- 385 26. Zheng Nan, Chi Yan-Yan, Yang Xiao-Han, Wang Nan-Xing, Li Yi-Lin, Ge Yang-Yang, Zhang  
386 Lan-Xin, Liu Tai-Yuan, Yuan Xiao-Ying, Yu Sheng-Bo, Sui Hong-Jin. 2018. Orientation and  
387 property of fibers of the myodural bridge in humans. — *Spine J*. 18(6):1081-1087. doi:  
388 10.1016/j.spinee.2018.02.006.
- 389 27. Shadwick RE, Gosline JM. 1995. Arterial Windkessels in marine mammals. — *Symp Soc Exp*  
390 *Biol*. 49:243-52.
- 391 28. Acosta Hospitaleche, C., Tambussi, C. 2006. Skull morphometry of *Pygoscelis*  
392 (*Sphenisciformes*): inter and intraspecific variations. — *Polar Biol*. 29(9):728–734.  
393 doi:10.1007/s00300-006-0109-6.
- 394 29. Nigel J. Adams, Christopher R. Brown. 1983. Diving Depths of the Gentoo Penguin  
395 (*Pygoscelis papua*). — *Condor*. 85(4):503-504.
- 396 30. Williams, T. D., Kato, A., Croxall, J. P., Briggs, D. R., & Barton, T. R. 1992. Diving Pattern  
397 and Performance in Nonbreeding Gentoo Penguins (*Pygoscelis papua*) during Winter. — *Auk*.  
398 109(2), 223–234. doi:10.2307/4088190.

399

400 **Spporting information**

401 S1 File. Staining methods.

402

403

404

405

406

407

408

409

410

411



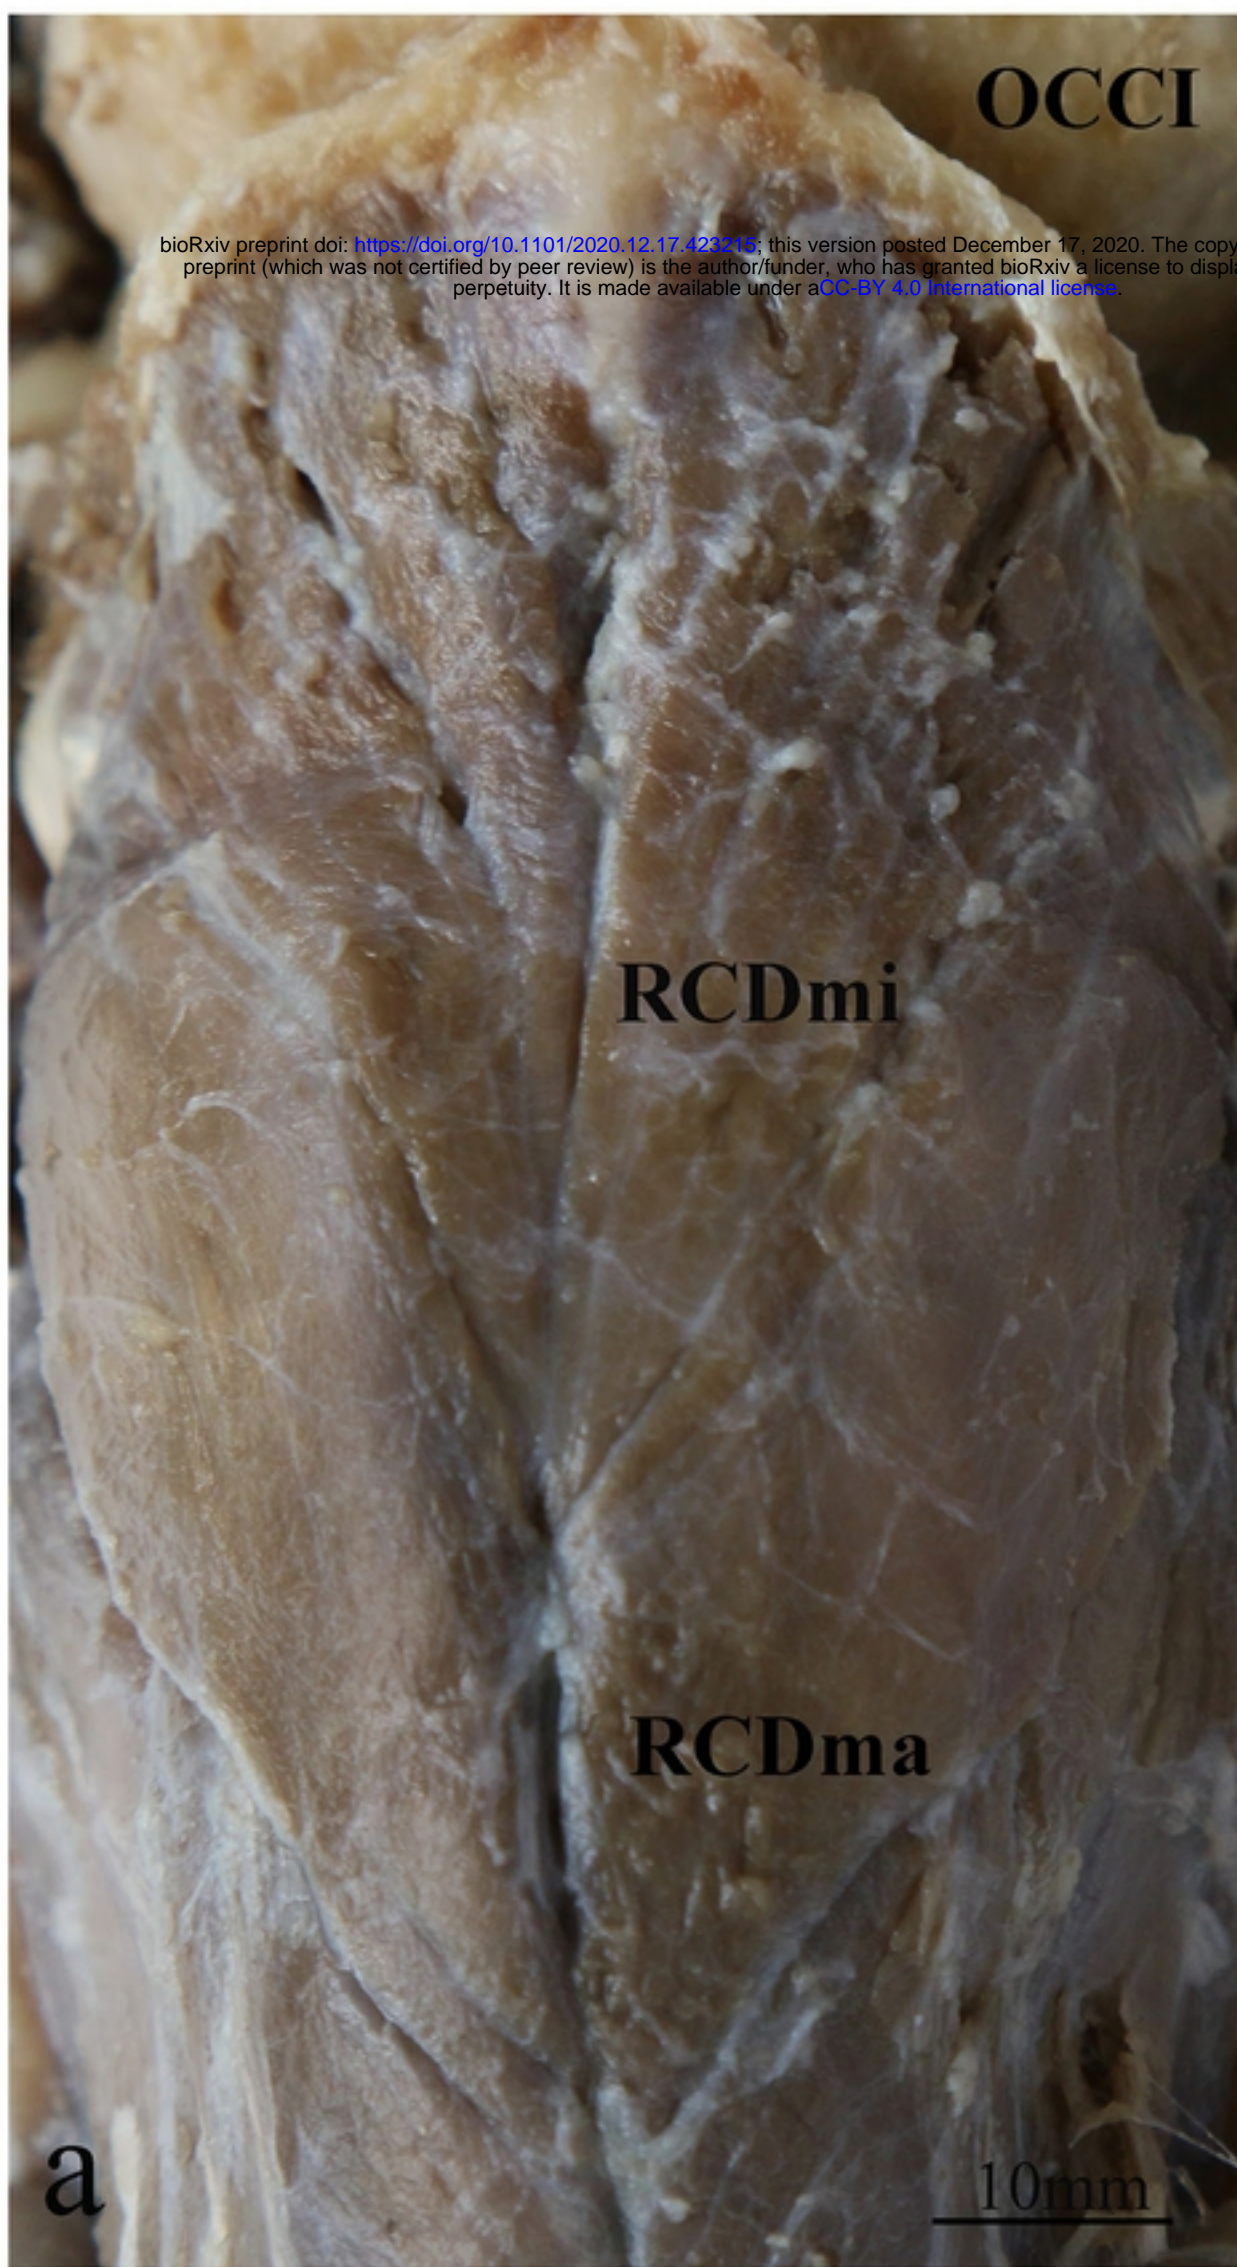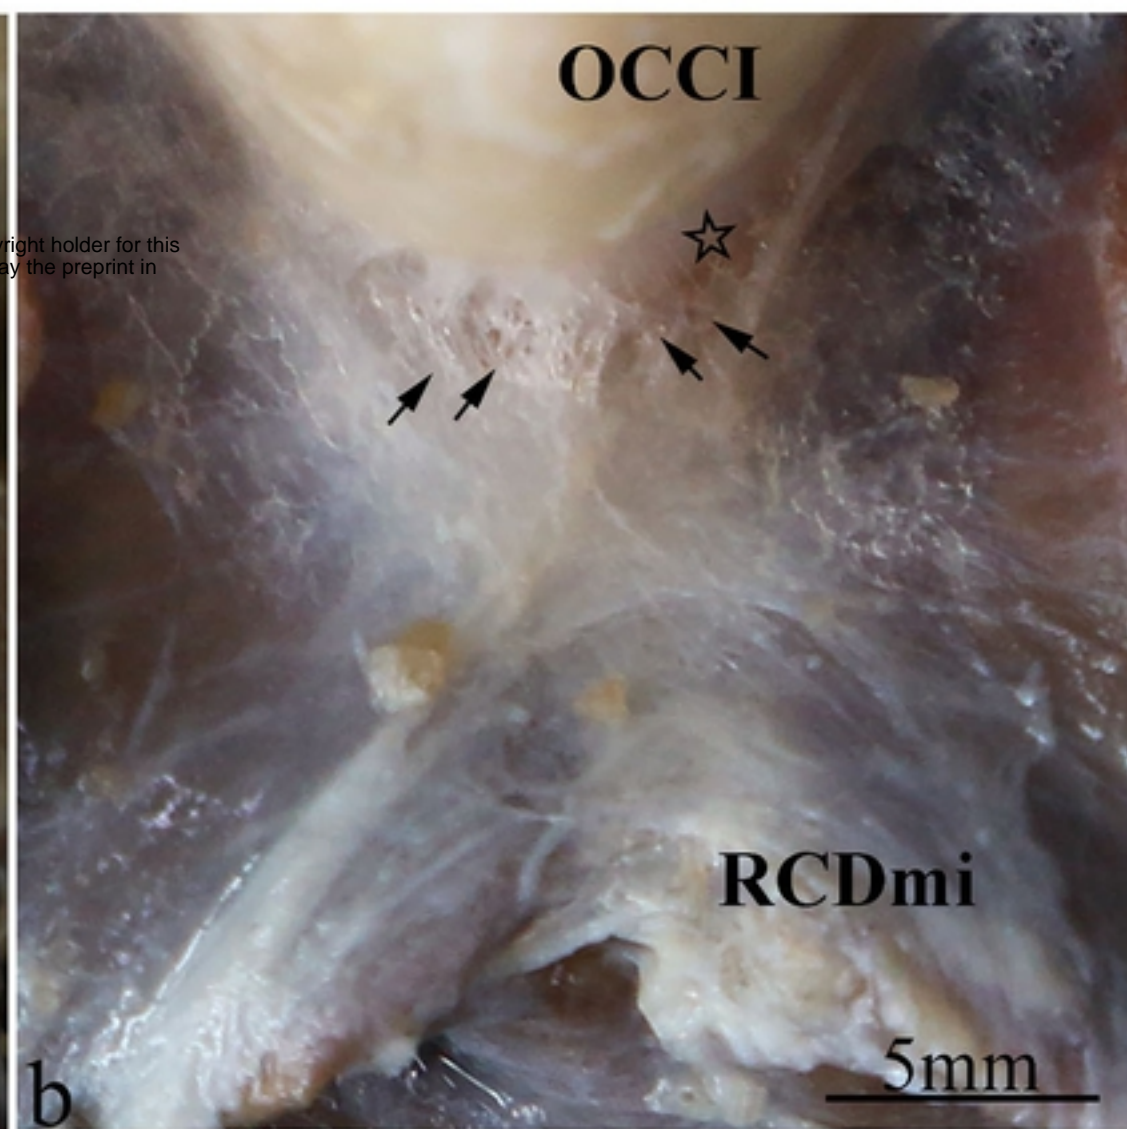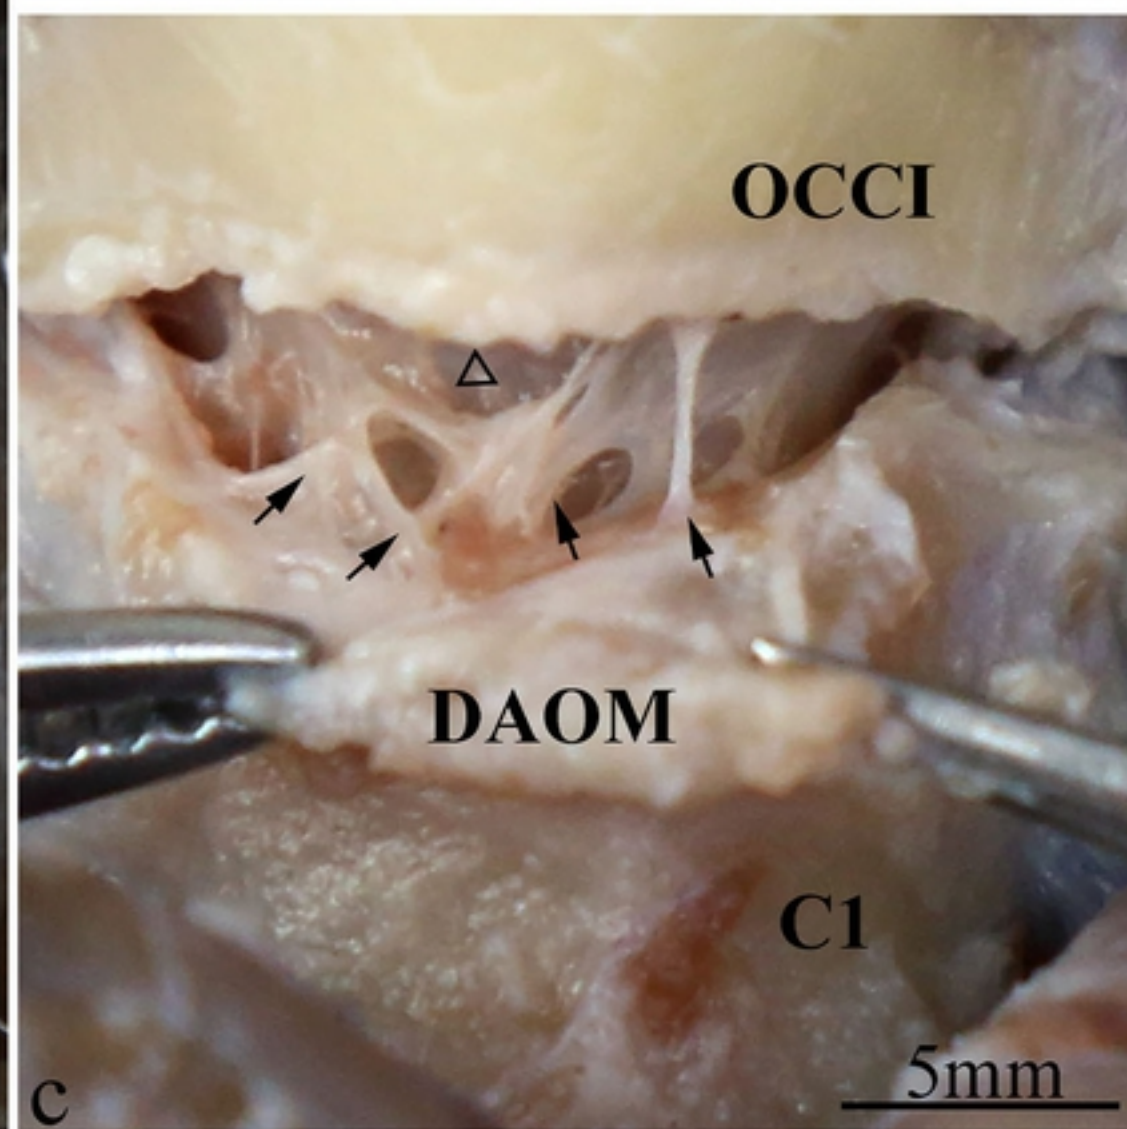

Figure



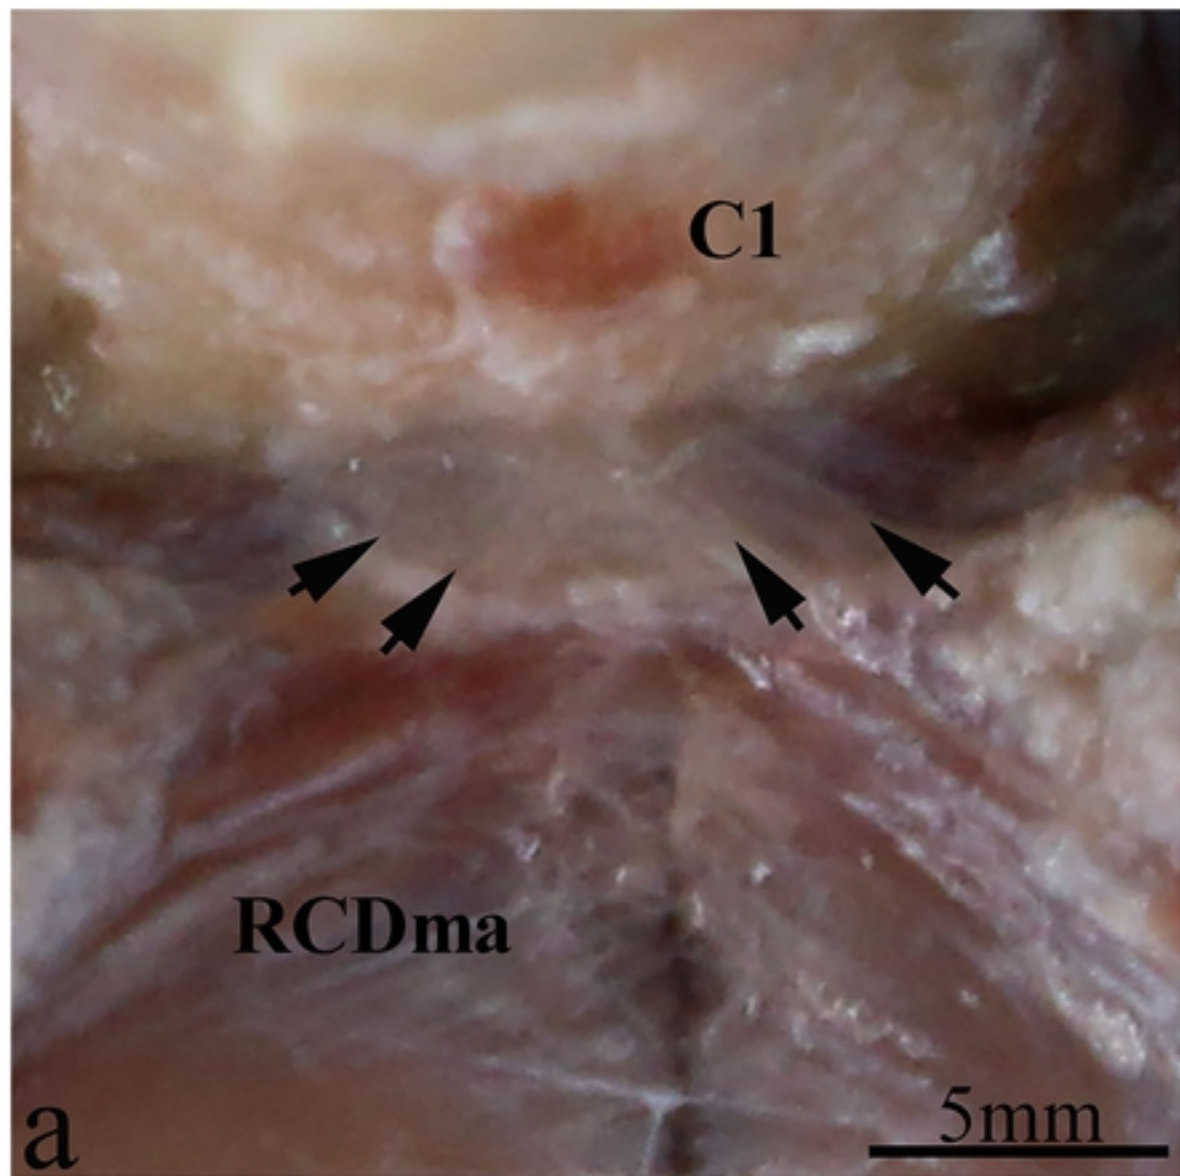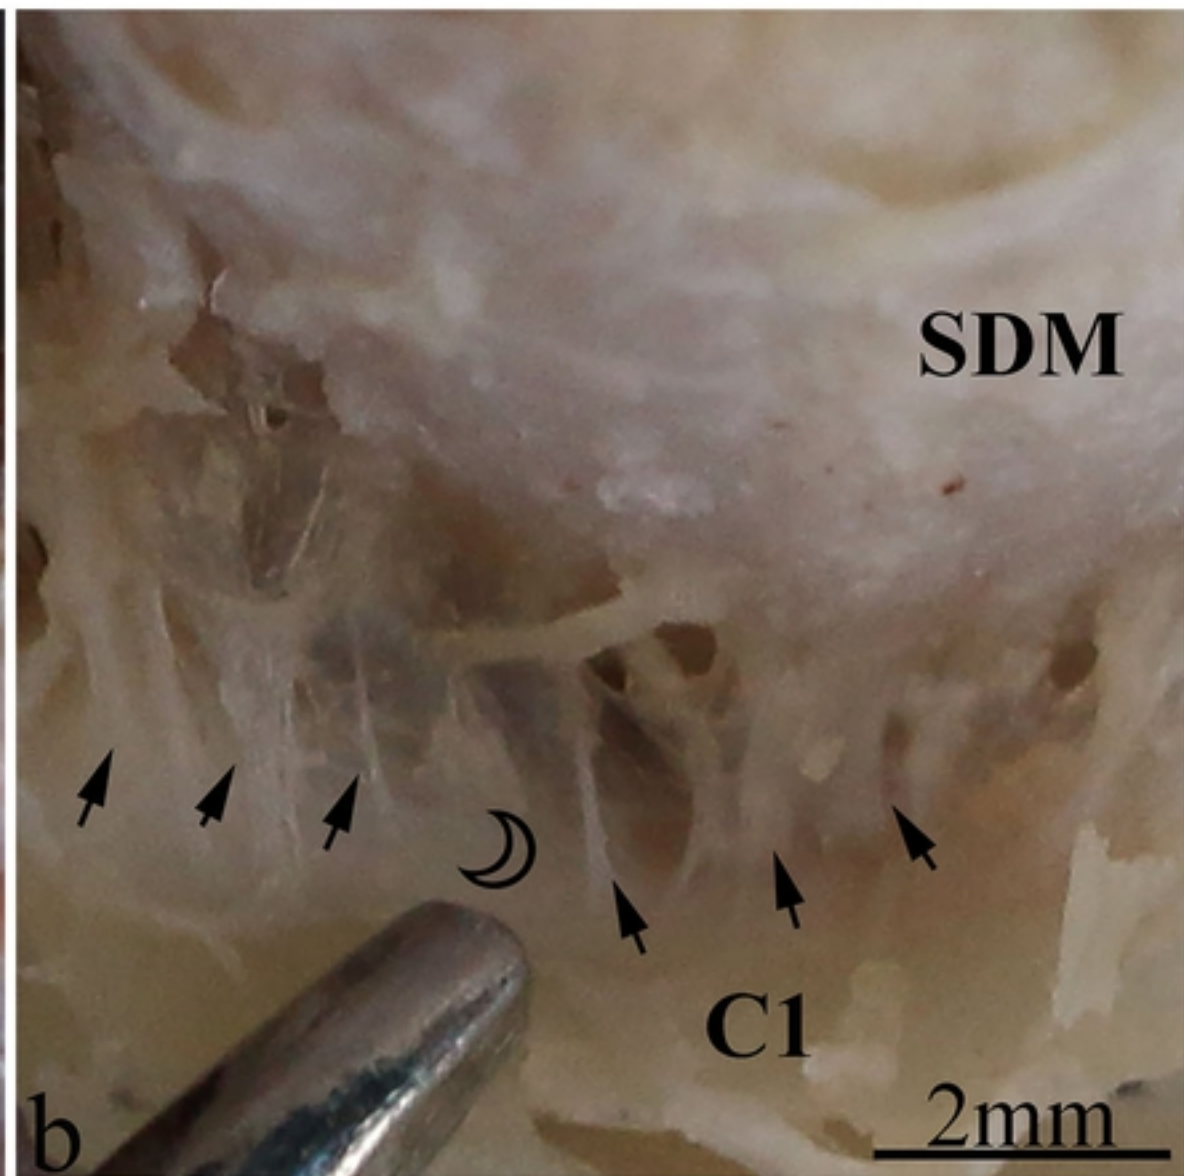

Figure



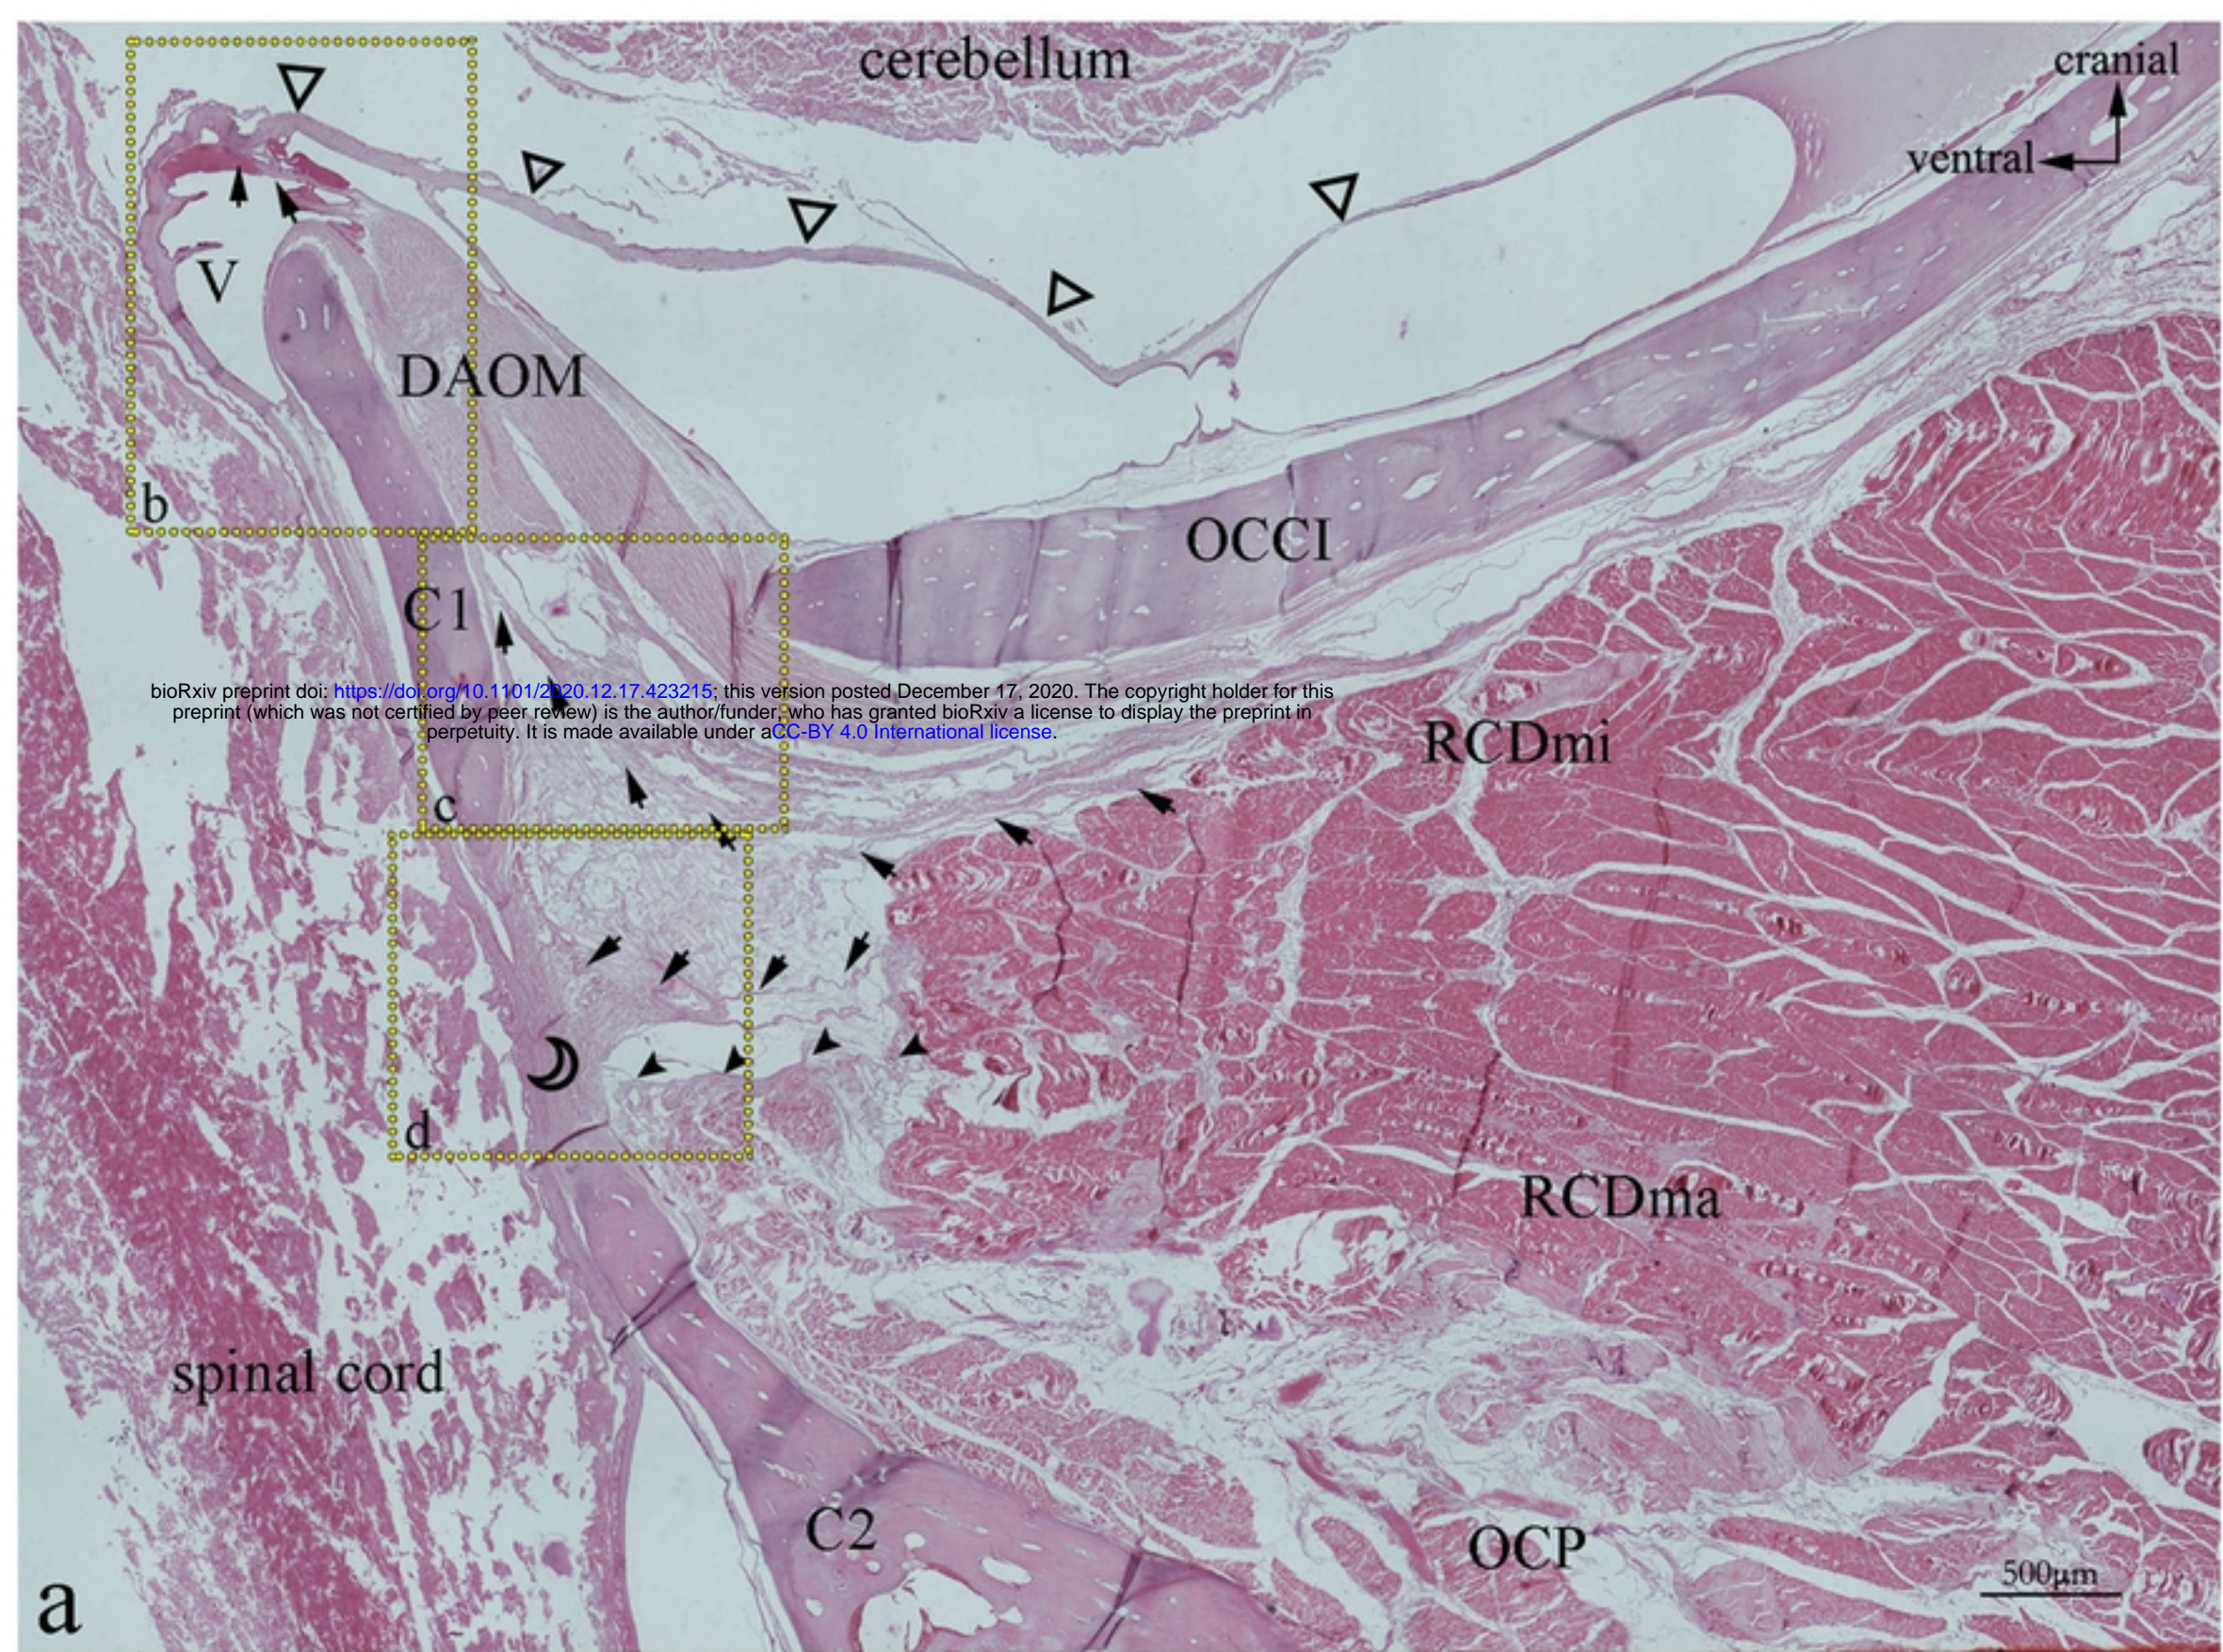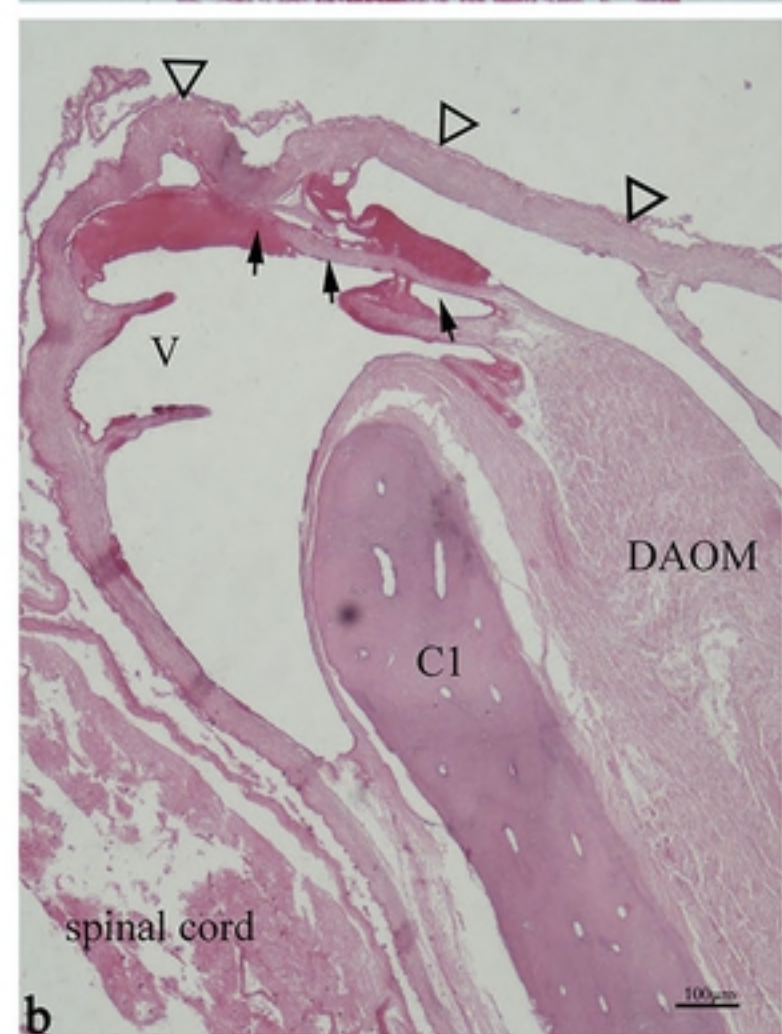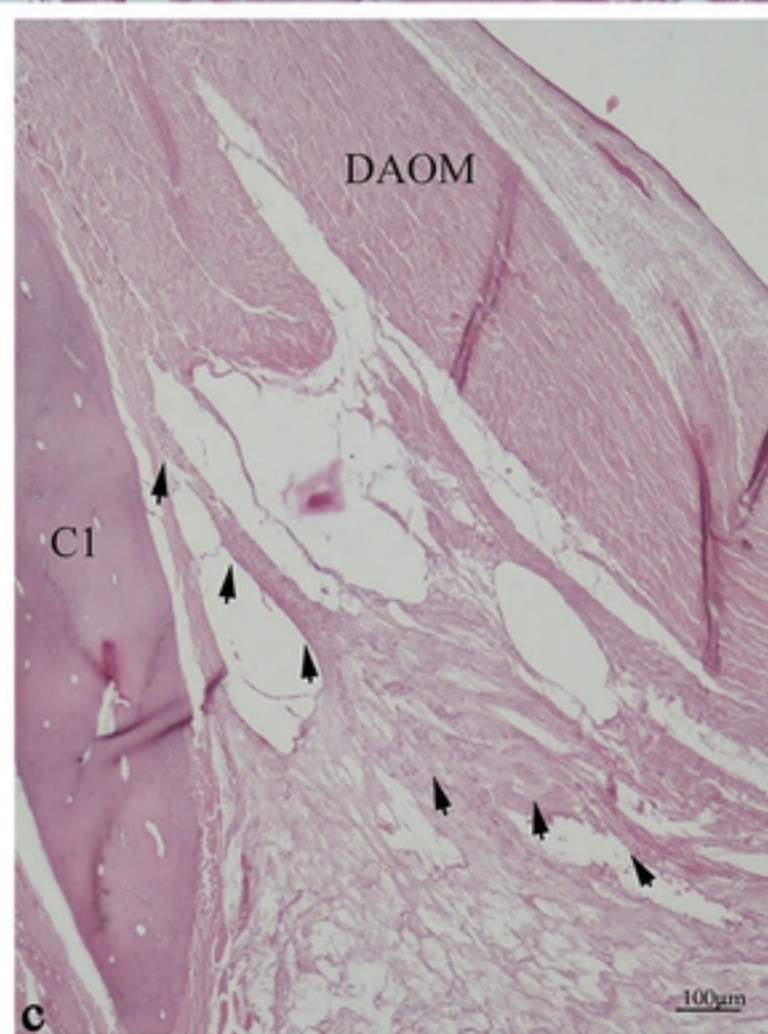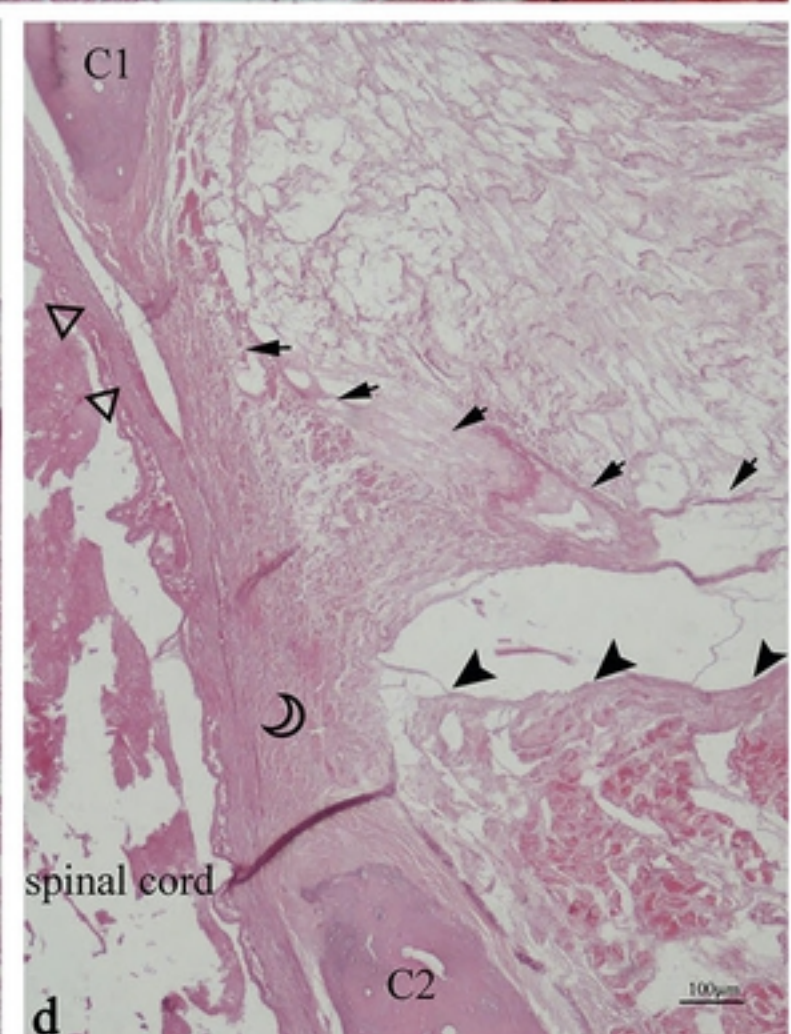

Figure







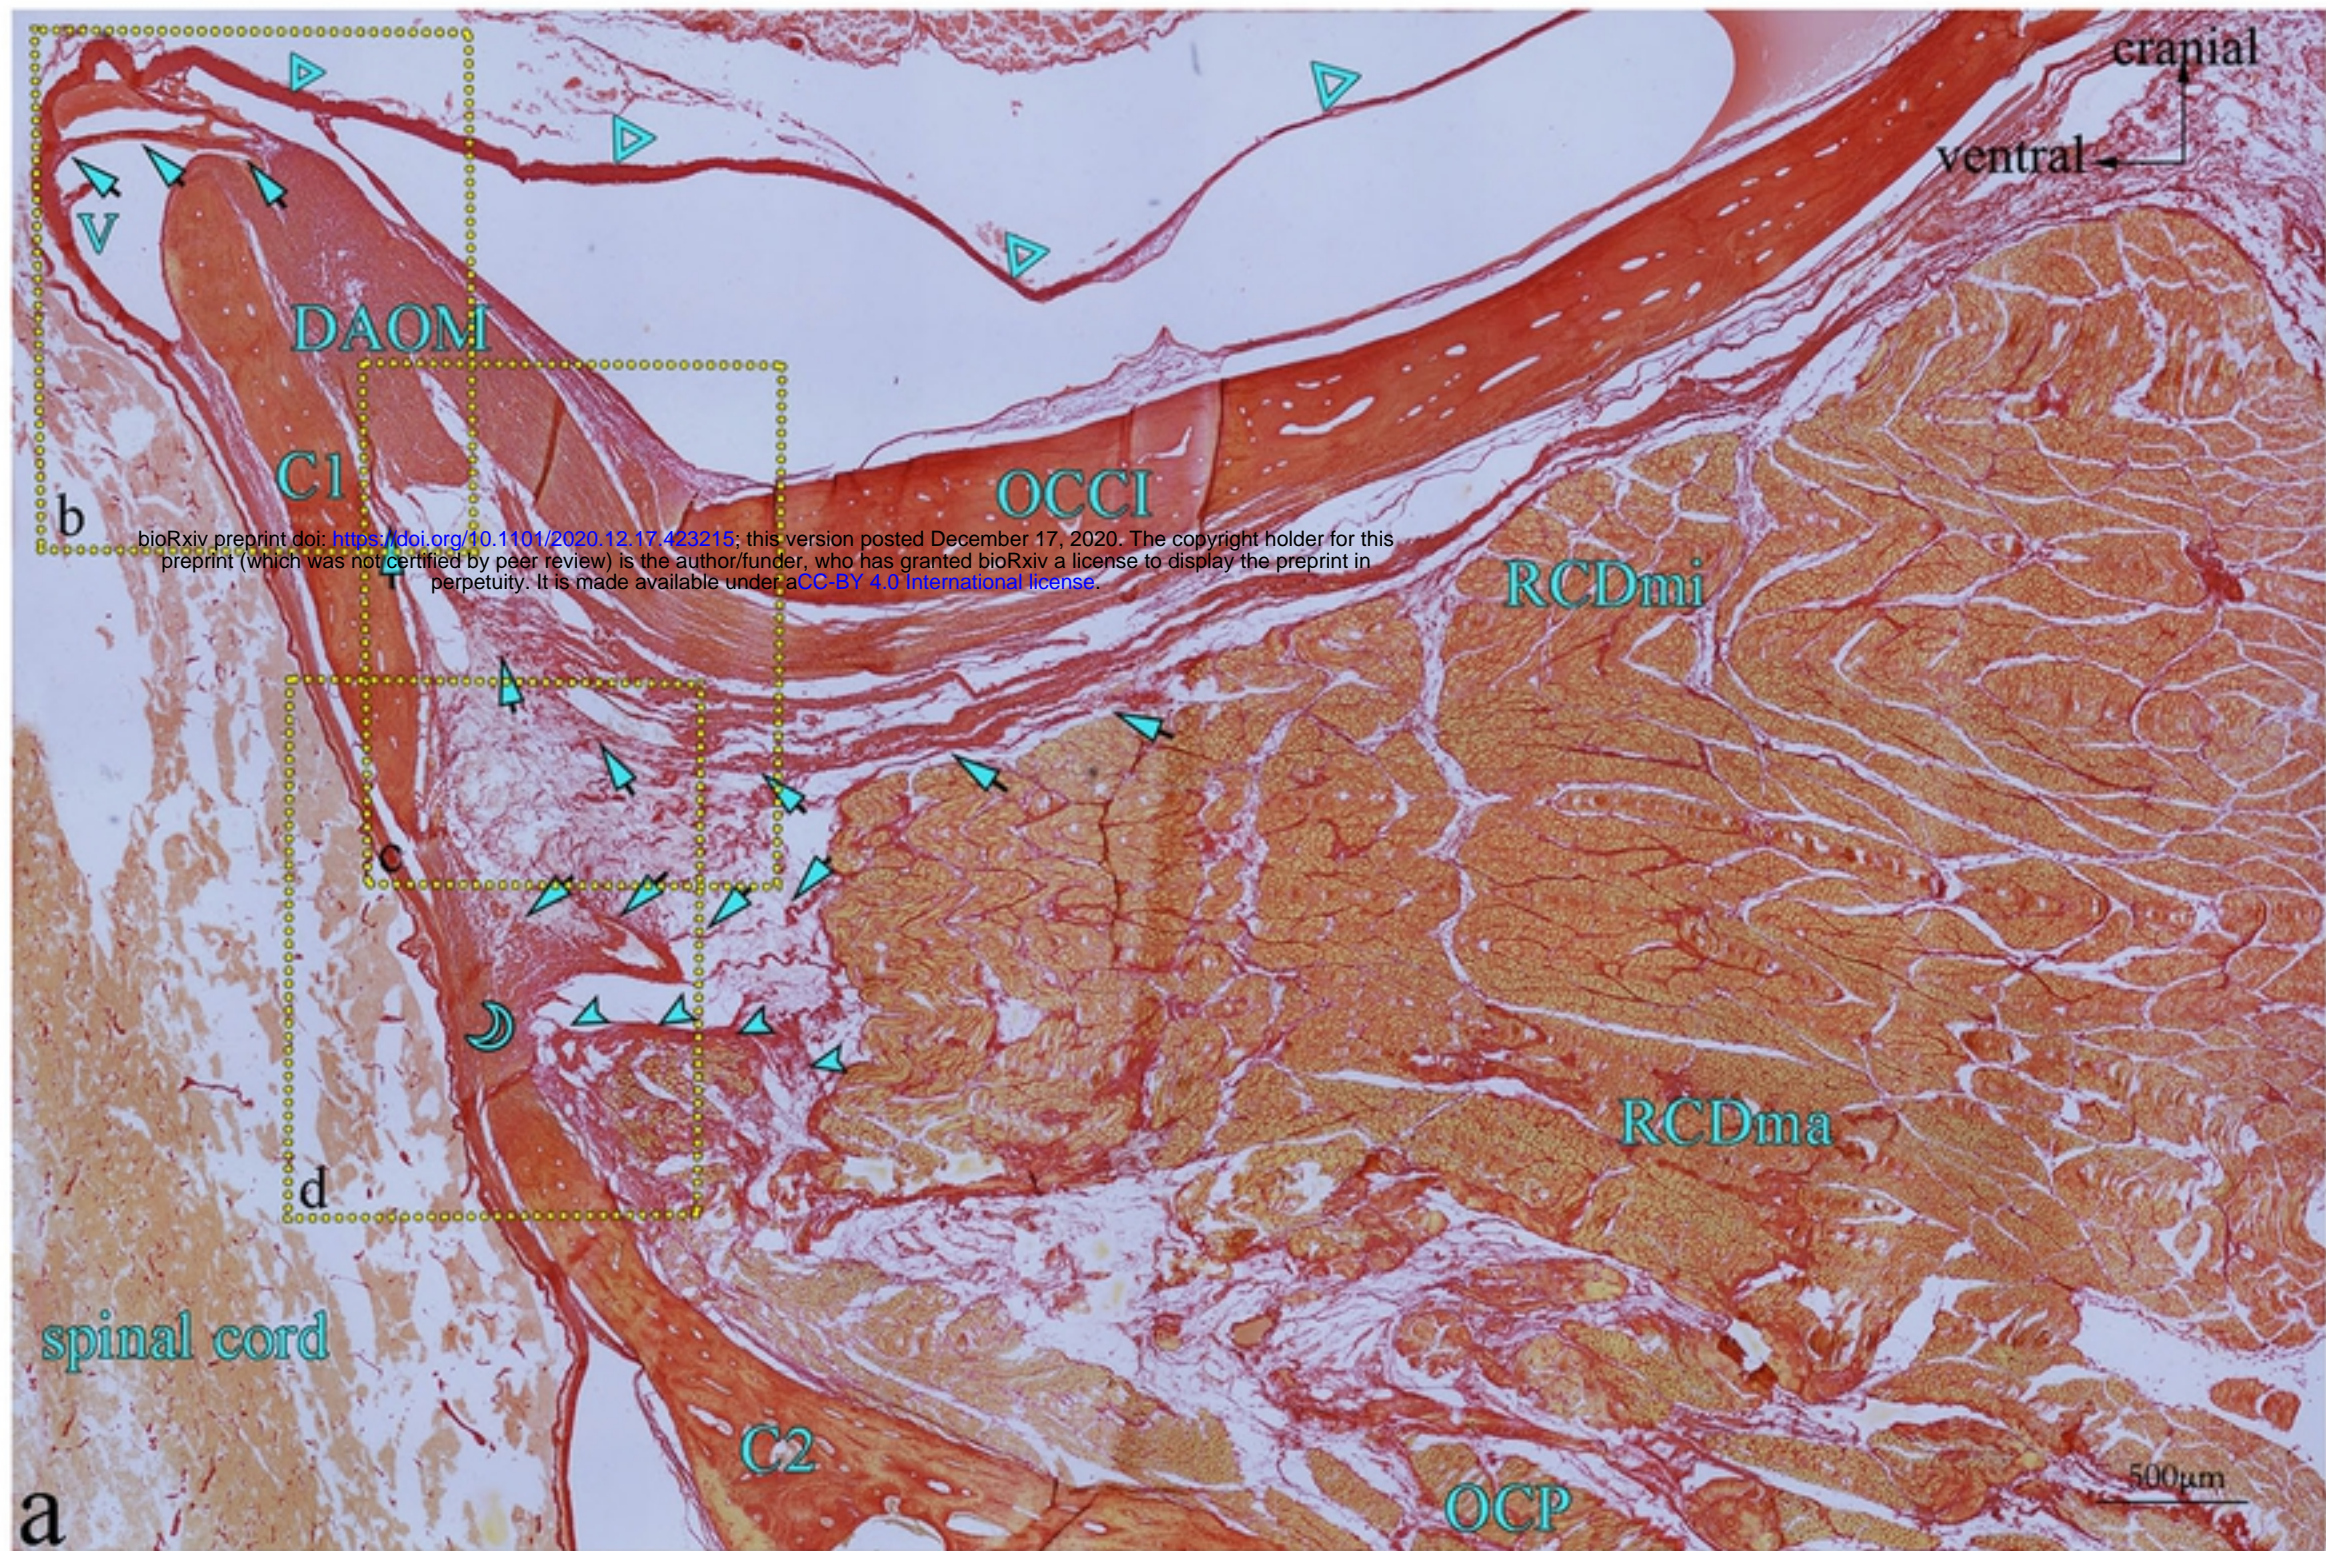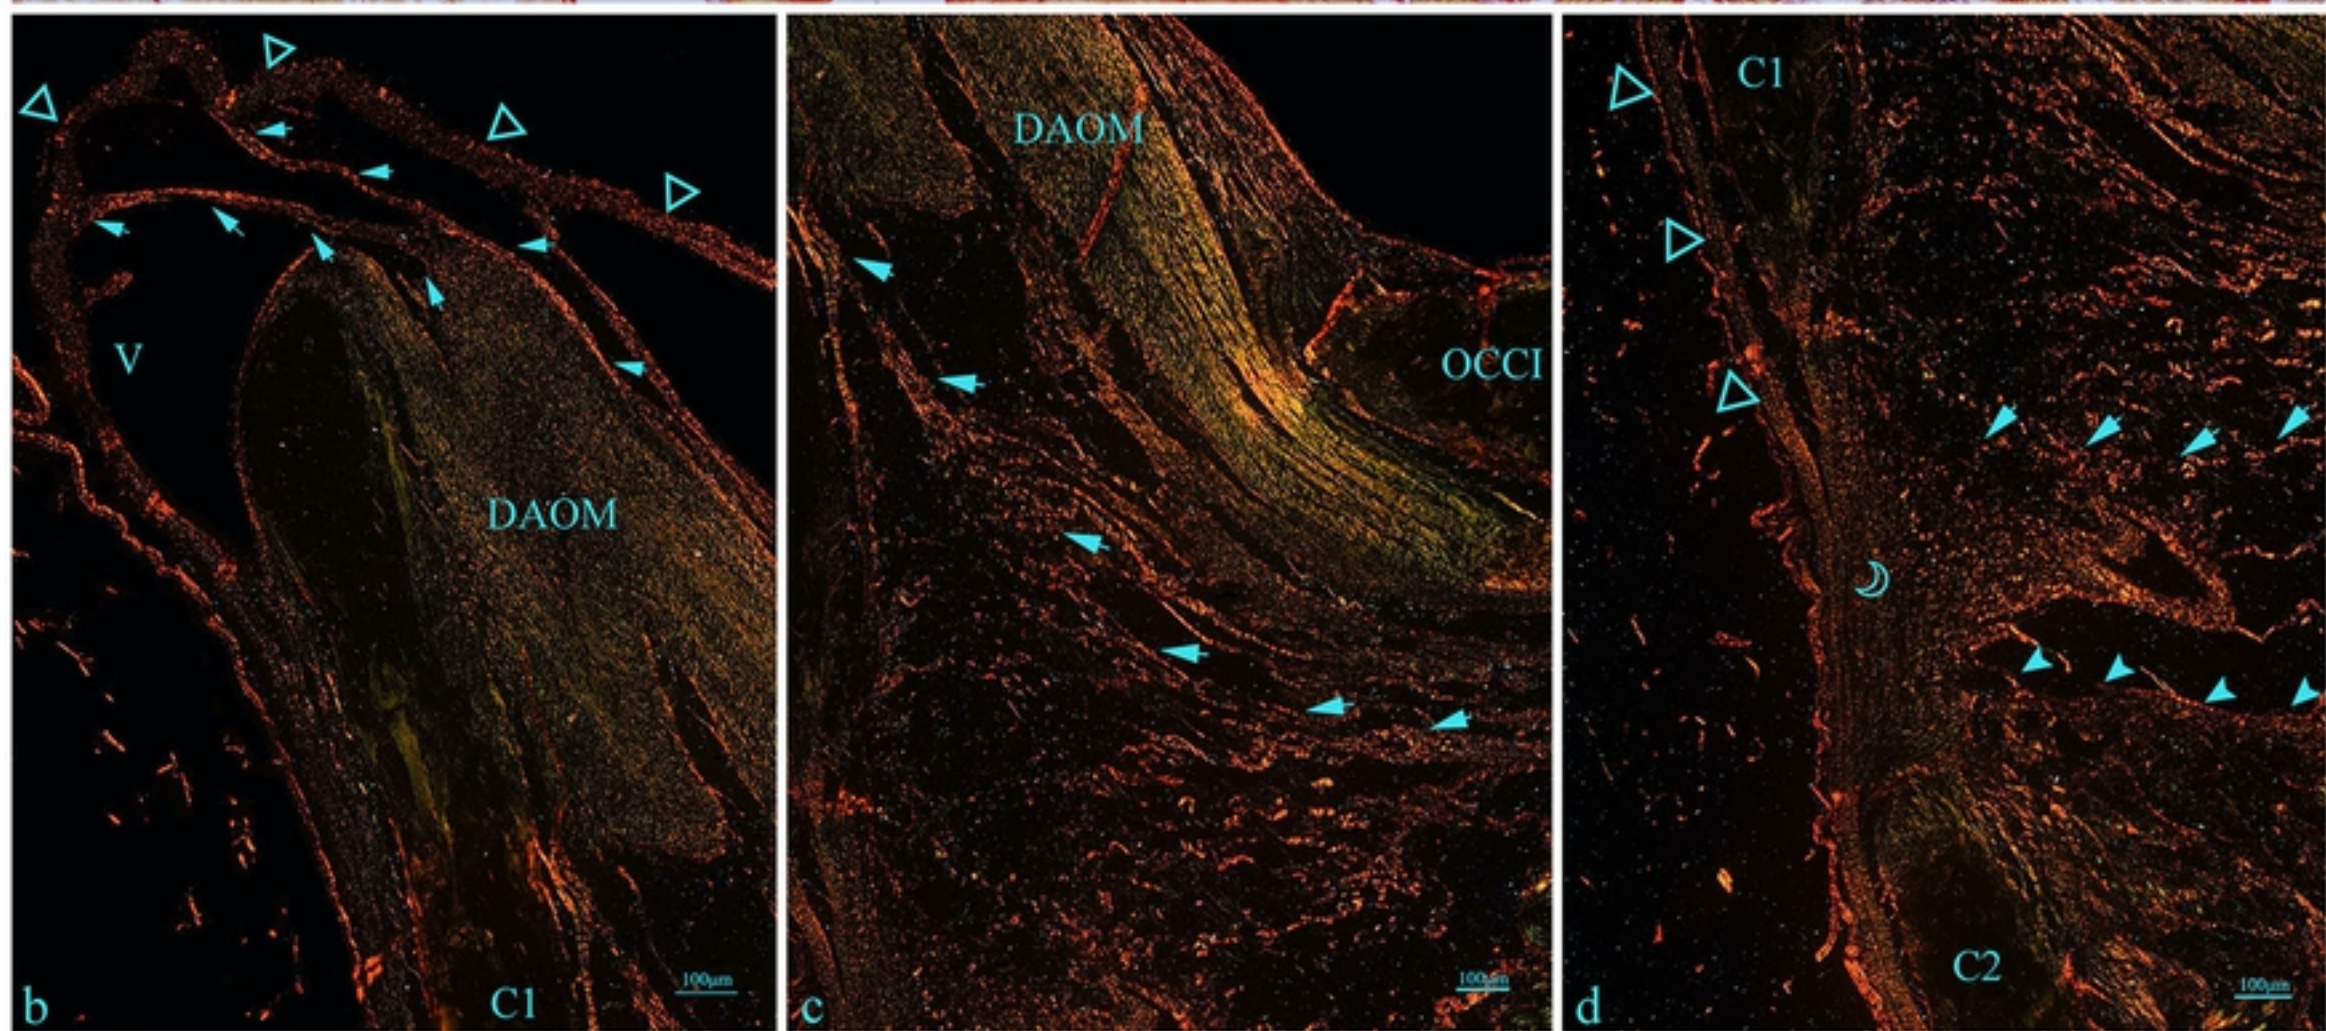

Figure
